# Supplementary material for: Facile fabrication of hollow tubular covalent organic frameworks using decomposable monomer as building block
Source: Royal Society of Chemistry journal article supplement (doi:10.1039/d1ra02104d), 2021-01-01
Supplement: d1ra02104d1.pdf [file d1ra02104d1.pdf]

1  
2  
3  
4  
5  
6  
7  
8  
9  
10  
11  
12  
13  
14  
15  
16  
17  
18  
19  
20  
21  
22  
23  
24

## Supporting information

# Facile Fabrication of Hollow Tubular Covalent Organic Frameworks Using Decomposable Monomer as Building Block

Ya Li<sup>a, b</sup>, Chang Wang<sup>a</sup>, Shujuan Ma<sup>a</sup>, Junwen Xu<sup>a, c</sup>, Xiaowei Li<sup>a, c</sup>, Yinmao Wei<sup>b</sup>,  
Junjie Ou<sup>a, c\*</sup>

<sup>a</sup> CAS Key Laboratory of Separation Science for Analytical Chemistry, Dalian Institute of Chemical Physics, Chinese Academy of Sciences, Dalian, 116023, China

<sup>b</sup> Key Laboratory of Synthetic and Natural Function Molecule Chemistry of Ministry of Education, College of Chemistry and Materials Science, Northwest University, Xi'an 710127, China

<sup>c</sup> University of Chinese Academy of Sciences, Beijing, 100049, China

\* To whom correspondence should be addressed:

Prof. Junjie Ou

Tel: +86-411-84379576

Fax: +86-411-84379620

E-mail: junjieou@dicp.ac.cn

## 25 **Materials**

26 Hydrazine hydrate (Azine), acetic acid (HAc), 1,2-dichlorobenzene (*o*-DCB), *N,N*-  
27 dimethylformamide (DMF), dimethyl sulfoxide (DMSO), *N,N*-dimethylacetamide  
28 (DMAc), chloroform-D (CDCl<sub>3</sub>) and dimethyl sulfoxide-d<sub>6</sub> (DMSO-d<sub>6</sub>) were from  
29 J&K Scientific Ltd. (Beijing, China). Benzaldehyde (BA), salicylaldehyde (SA), FH  
30 and TFB were obtained from Sigma (St Louis, USA). Tp was obtained from Huawei-  
31 Ruike (Beijing, China). 1,4-Dioxane, mesitylene and tetrahydrofuran (THF) were  
32 supplied by Tianjin Kermel Plant of Chemical Reagent (Tianjin, China). Water was  
33 purified with a Milli-Q system from Millipore (Milford, USA). Standard pH buffer  
34 solutions purchased from Beijing Solarbio Science & Technology were used to  
35 control the pH values as 4.01, 7.01 and 10.01. Standard HCl (0.1 M) and NaOH (0.1  
36 M) solutions were prepared for pH=1 and pH=13, respectively.

## 37 **Synthesis of reference compounds**

38 A model compound, *N,N'*-hydrazinebis(salicylideneimine) (SAAzine), was obtained  
39 by the reaction between SA and Azine. Solution of SA (1.3 mL, 12.5 μmol) was  
40 dissolved in dioxane/mesitylene (1:1, 2 mL) with vigorous stirring over 30 min. In  
41 addition, 1 mL Azine (373 μL, 6.25 μmol) was prepared, and then slowly added into  
42 SA solution. After sonication for 30 min, 0.3 mL of aqueous HAc (6 M) was added.  
43 The mixture solution was refluxed for 3 d. After cooling to room temperature, the  
44 product was isolated and dried under reduced pressure.

45 A reference compound, 1,2-di(benzylidene)hydrazine (BAAzine), was obtained by  
46 the reaction between BA and Azine. Solution of BA (1.25 mL, 12.5 μmol) was  
47 dissolved in 2 mL dioxane/mesitylene at 25 °C with ultrasonic dispersion over 30 min.  
48 In addition, 1 mL Azine dioxane/mesitylene solution (373 μL, 6.25 μmol) was  
49 prepared, and then slowly added into the solution of BA. The mixture solution was  
50 refluxed for 3 d. After cooling to room temperature, the product was isolated and  
51 dried under reduced pressure.

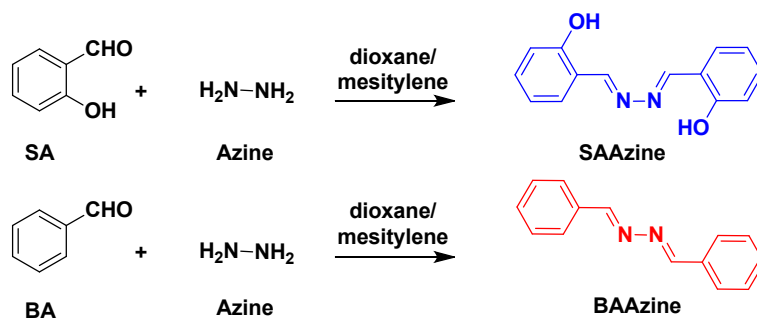

52

53 *N*'-(2-Hydroxybenzylidene)formohydrazide (SAFH) was synthesized with  
 54 salicylaldehyde and formic hydrazide, while 2-(benzylidene)-1-methylhydrazide  
 55 (BAFH) was synthesized with benzaldehyde and formic hydrazide using the same  
 56 reaction conditions as the hydrazine-series COFs. SAFH was achieved with SA (130  
 57  $\mu\text{L}$ , 1.25  $\mu\text{mol}$ ) and FH (0.035 g, 0.625  $\mu\text{mol}$ ). BAFH was achieved with BA (125  $\mu\text{L}$ ,  
 58 1.25  $\mu\text{mol}$ ) and FH (0.035 g, 0.625  $\mu\text{mol}$ ).

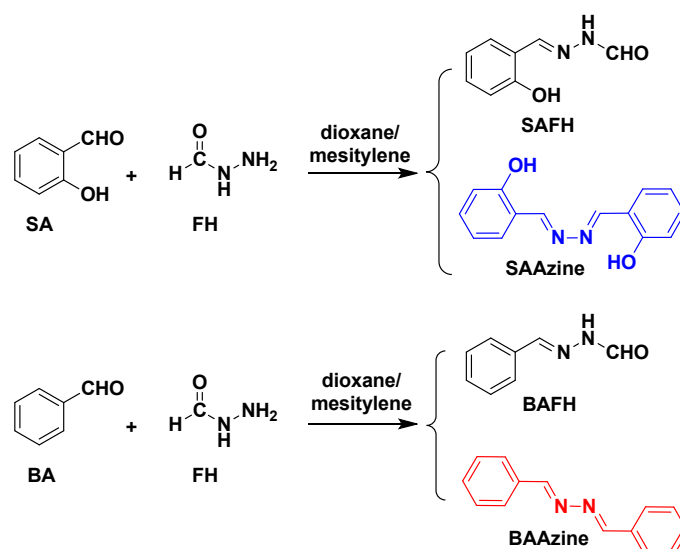

59

60

61

62

63

64

65

66

67

68

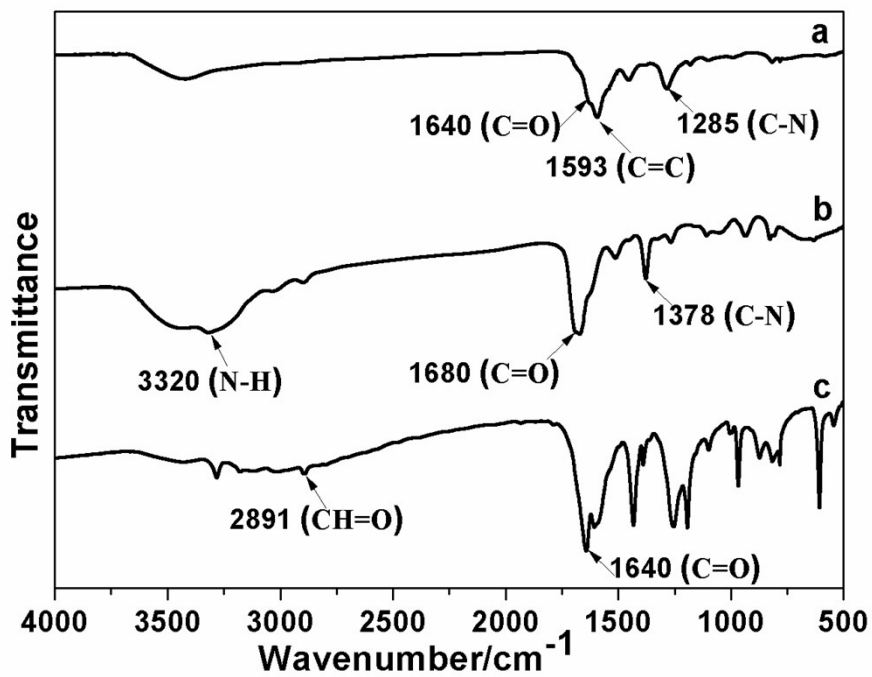

**Fig. S1.** FT-IR spectra of (a) COF, TpFH, and monomers of (b) FH and (c) Tp.

69  
70  
71  
72  
73  
74  
75  
76  
77  
78  
79  
80  
81  
82  
83  
84  
85  
86  
87  
88  
89  
90  
91  
92  
93  
94  
95

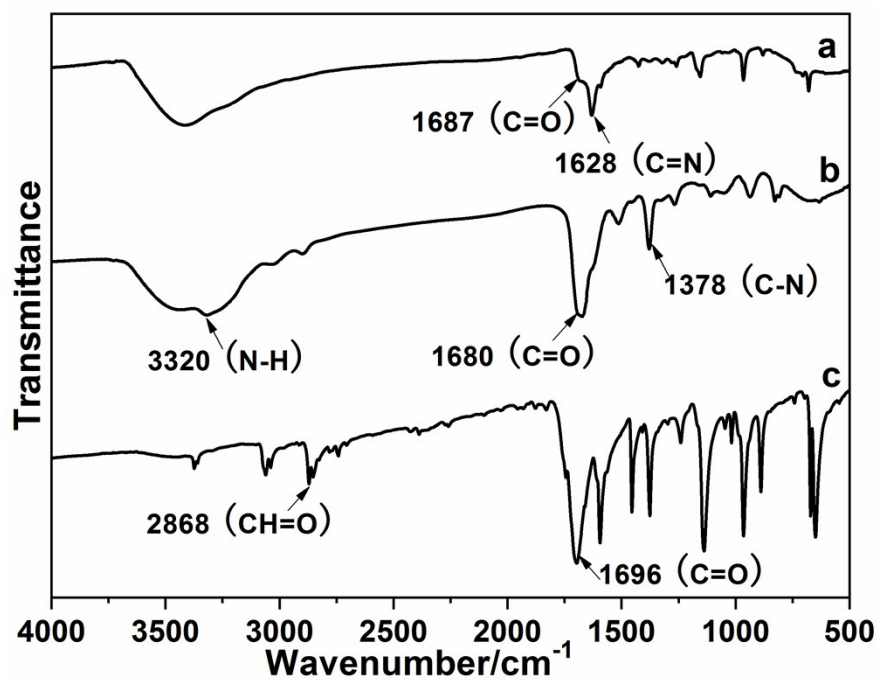

96  
 97  
 98  
 99  
 100  
 101  
 102  
 103  
 104  
 105  
 106  
 107  
 108  
 109  
 110

**Fig. S2.** FT-IR spectra of (a) COF, TFBFH, and monomers of (b) FH and (c) TFB.

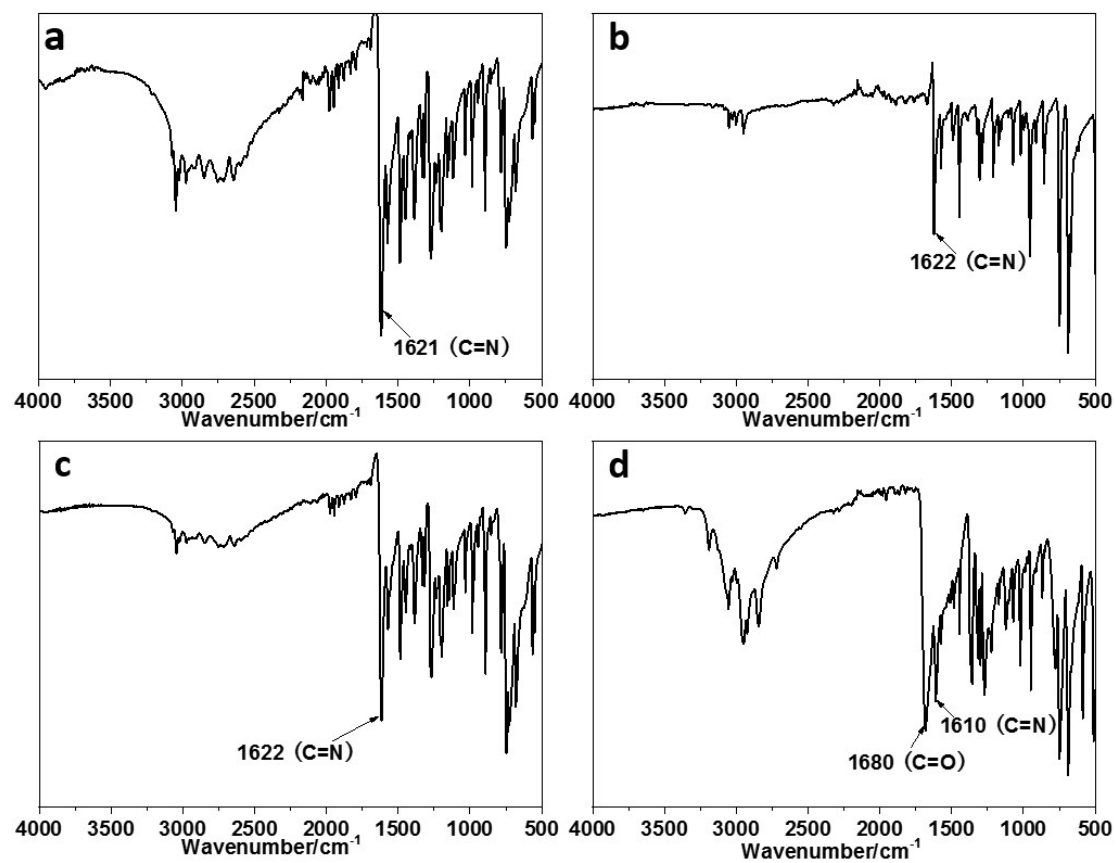

111

112 **Fig. S3.** FT-IR spectra of four kinds of products including (a) SA reacts with Azine,

113 (b) BA reacts with Azine, (c) SA reacts with FH and (d) BA reacts with FH.

114

115

116

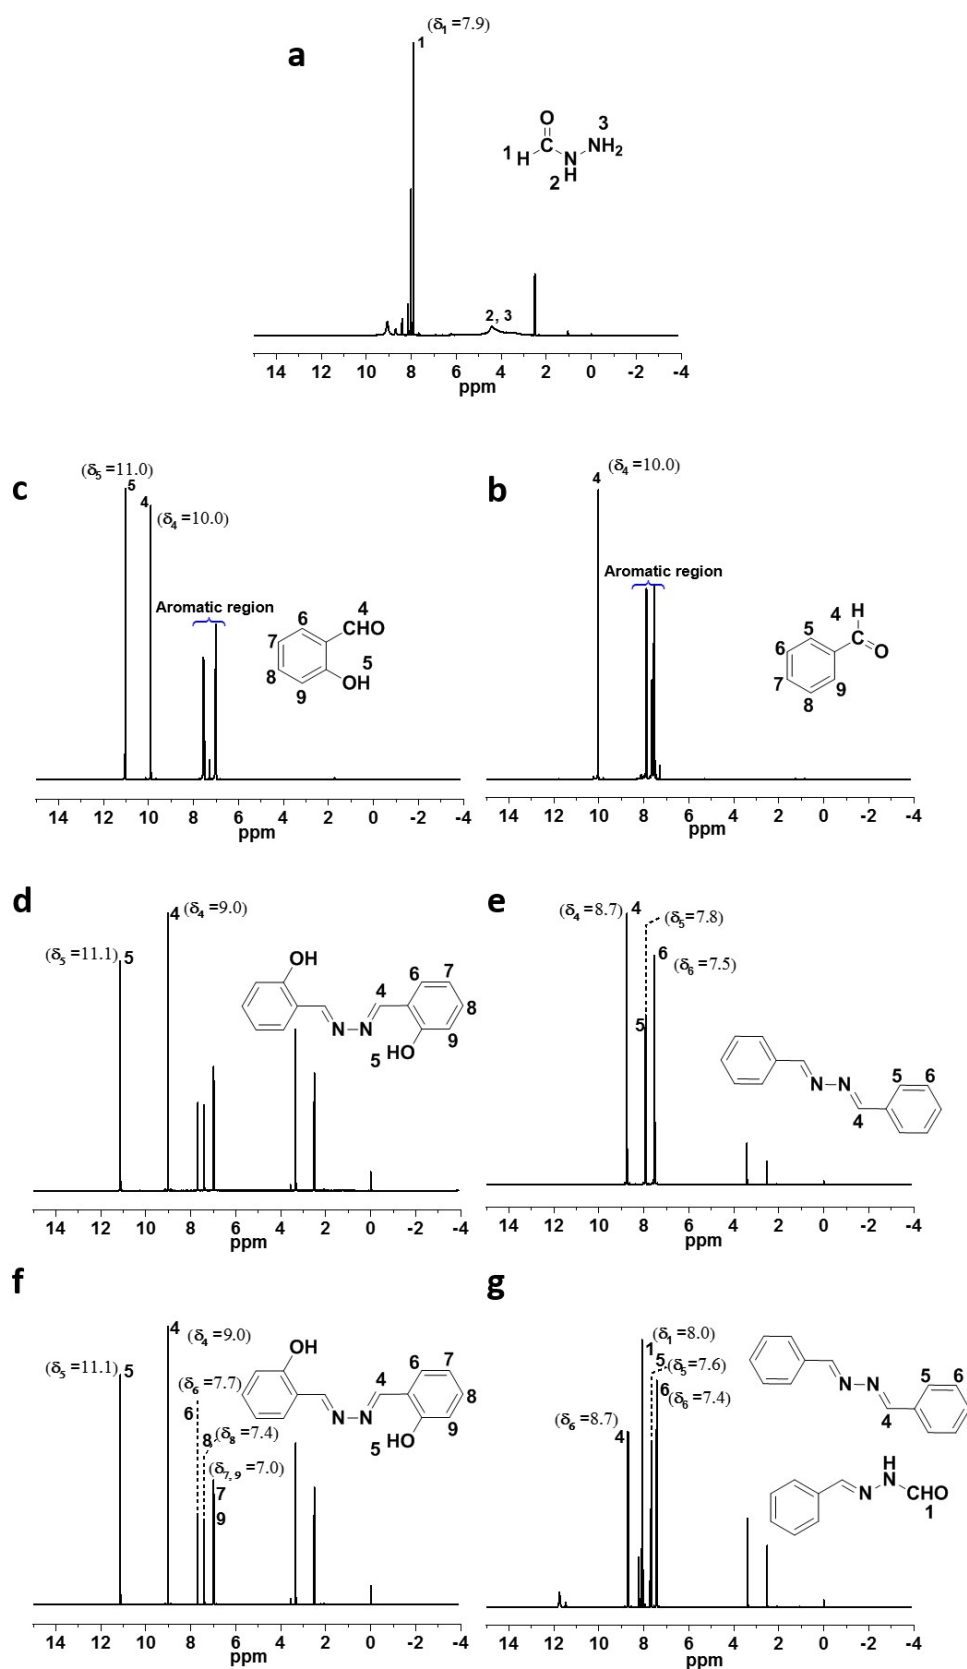

117

118 **Fig. S4.**  $^1\text{H}$  NMR spectra of monomers (a) FH, (b) SA, (c) BA and the products of (d)

119 SA reacts with Azine, (e) BA reacts with Azine, (f) SA reacts with FH and (g) BA

120

reacts with FH.

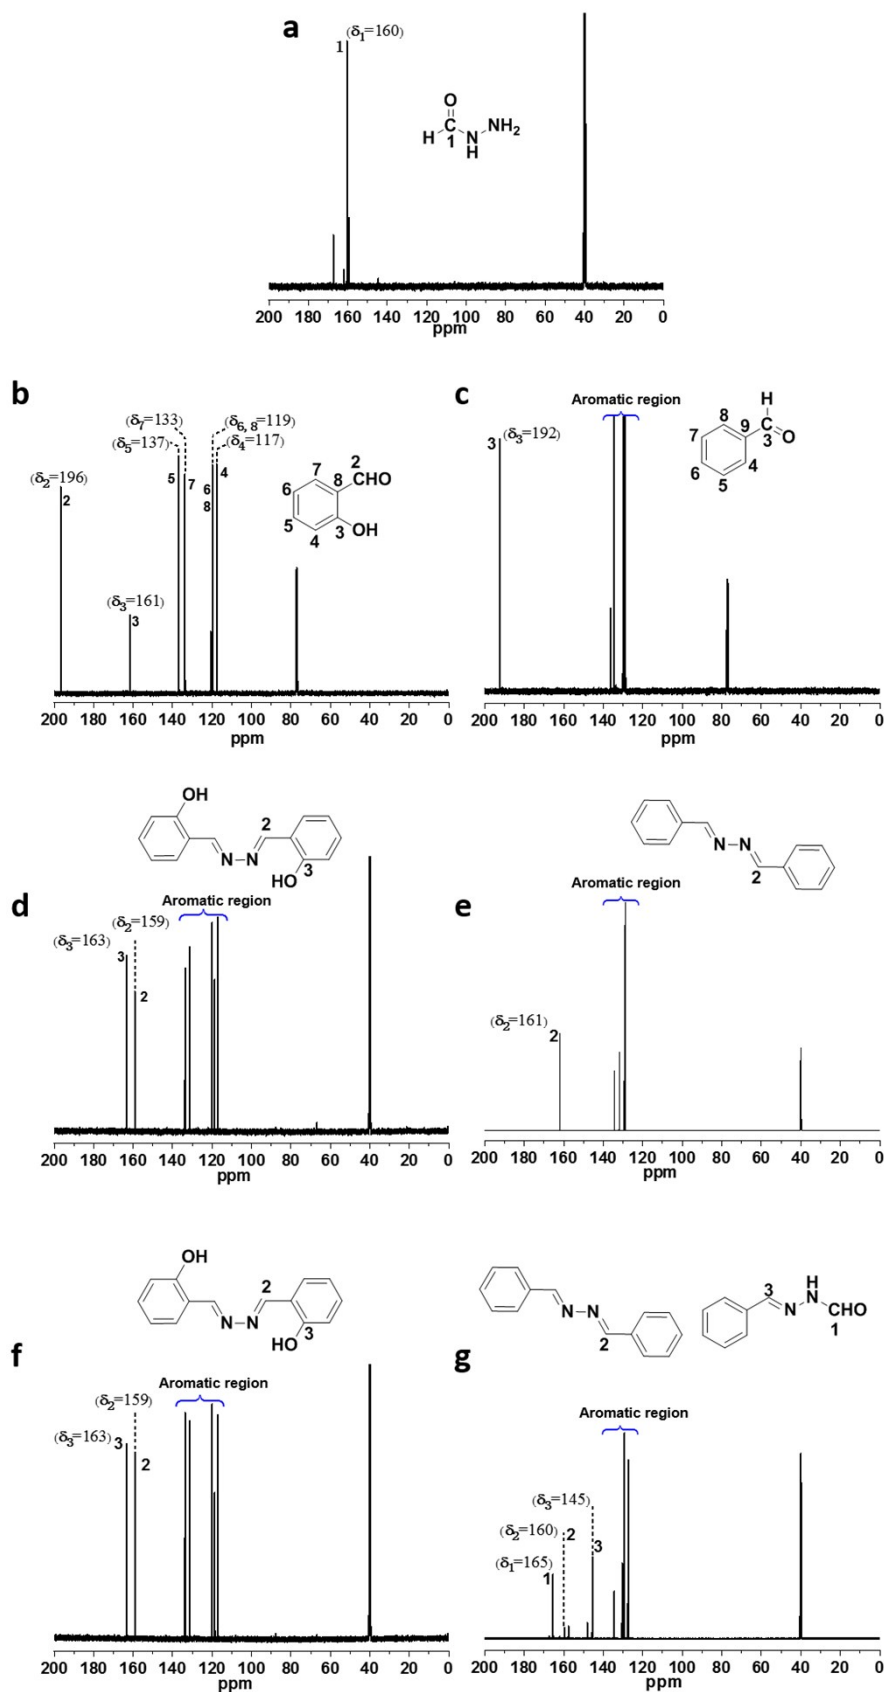

121

122 **Fig. S5.**  $^{13}\text{C}$  NMR spectra of monomers (a) FH, (b) SA, (c) BA and the products of  
 123 (d) SA reacts with Azine, (e) BA reacts with Azine, (f) SA reacts with FH and (g) BA  
 124 reacts with FH.



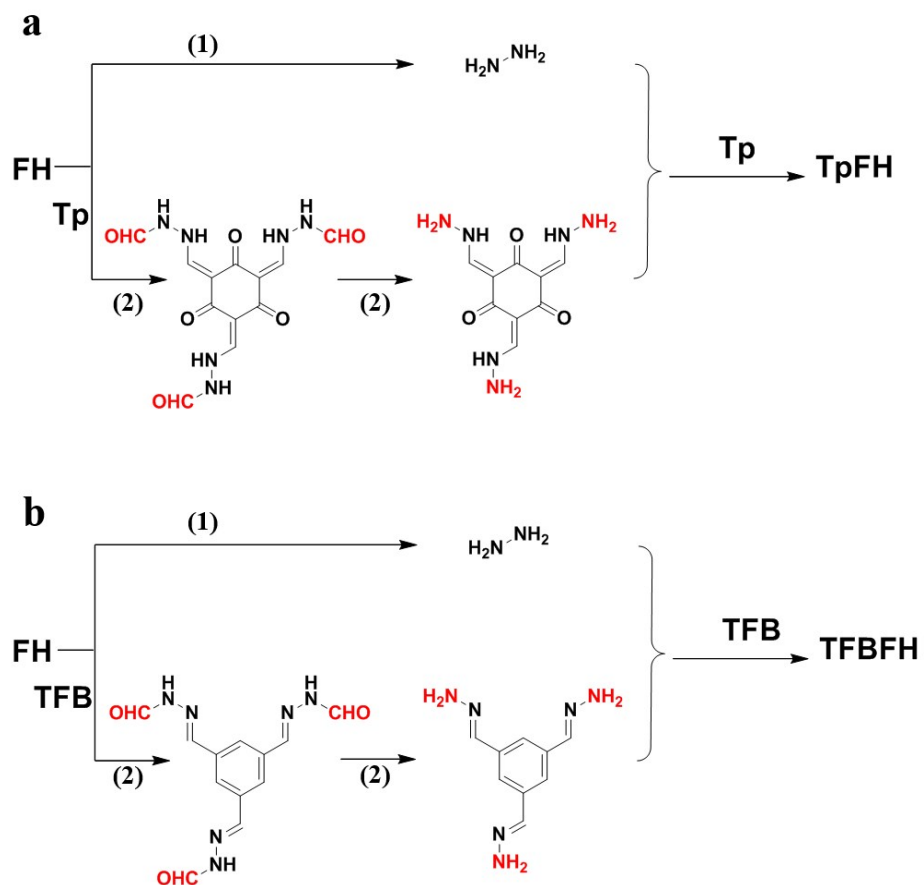

125  
126  
127  
128  
129  
130  
131  
132  
133

**Fig. S6.** The proposed reaction mechanism in formation of FH-based COFs.

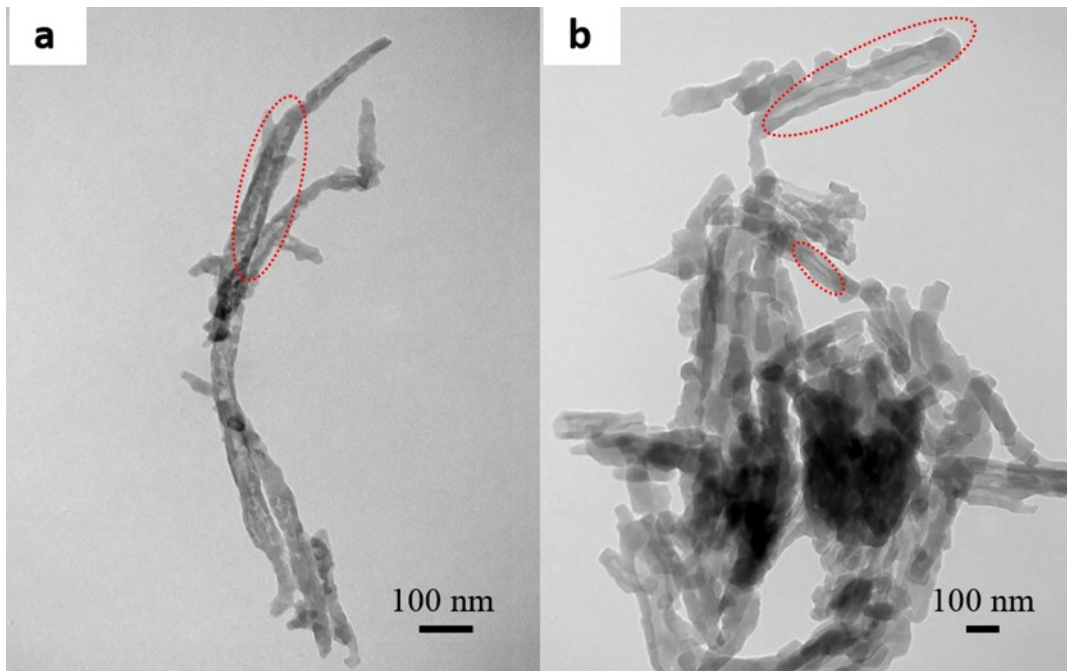

134  
135  
136  
137  
138  
139  
140  
141  
142  
143  
144  
145  
146  
147  
148  
149  
150  
151  
152  
153  
154  
155  
156  
157  
158  
159

**Fig. S7.** TEM images of (a) TpFH and (b) TFBFH single microtube indicating the hollow nature of the tube.

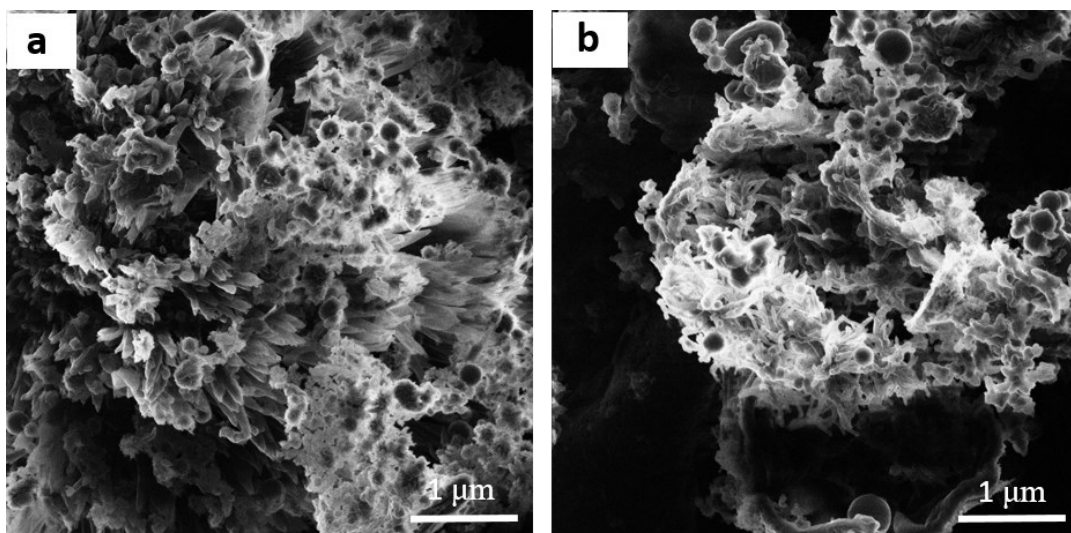

160  
161  
162  
163  
164  
165  
166  
167  
168  
169  
170  
171  
172  
173  
174  
175  
176  
177  
178  
179  
180  
181  
182  
183  
184  
185  
186  
187  
188  
189  
190  
191

**Fig. S8.** HIM images of (a) TpAzine and (b) TFBAzine showing flower like morphology.

192

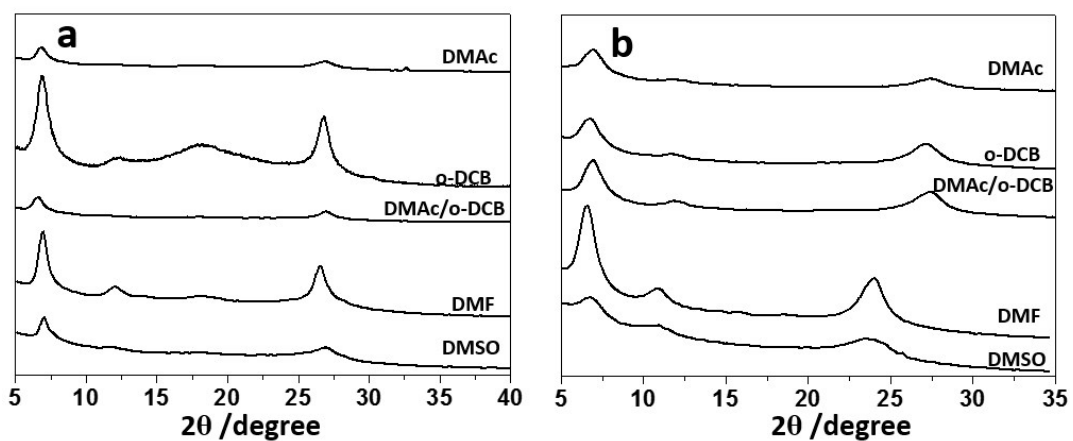

193

194 **Fig. S9.** PXR D patterns of (a) TpFH and (b) TFBFH fabricated with different solvents.

195

196

197

198

199

200

201

202

203

204

205

206

207

208

209

210

211

212

213

214

215

216

217

218

219

220

221

222

223

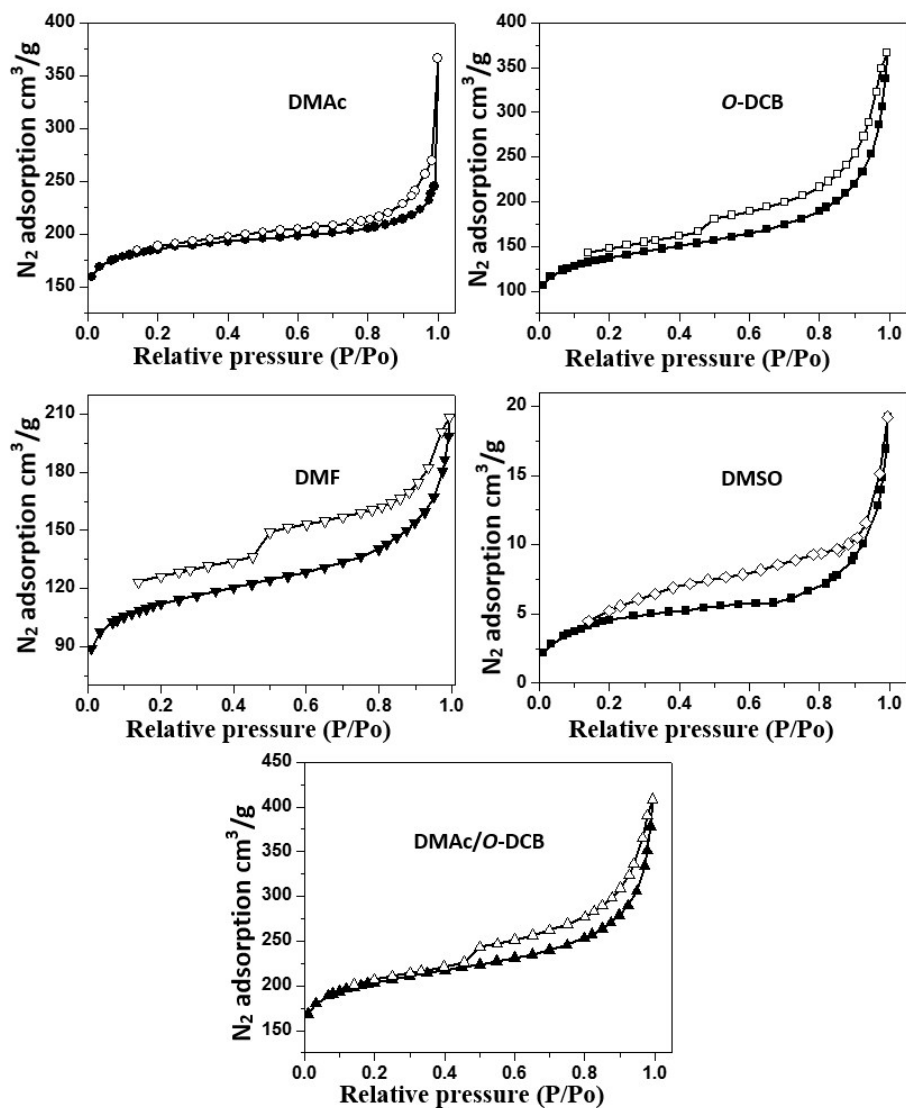

224

225

**Fig. S10.** N<sub>2</sub> adsorption isotherm of TpFH fabricated with different solvents.

226

227

228

229

230

231

232

233

234

235

236

237

238

239

240

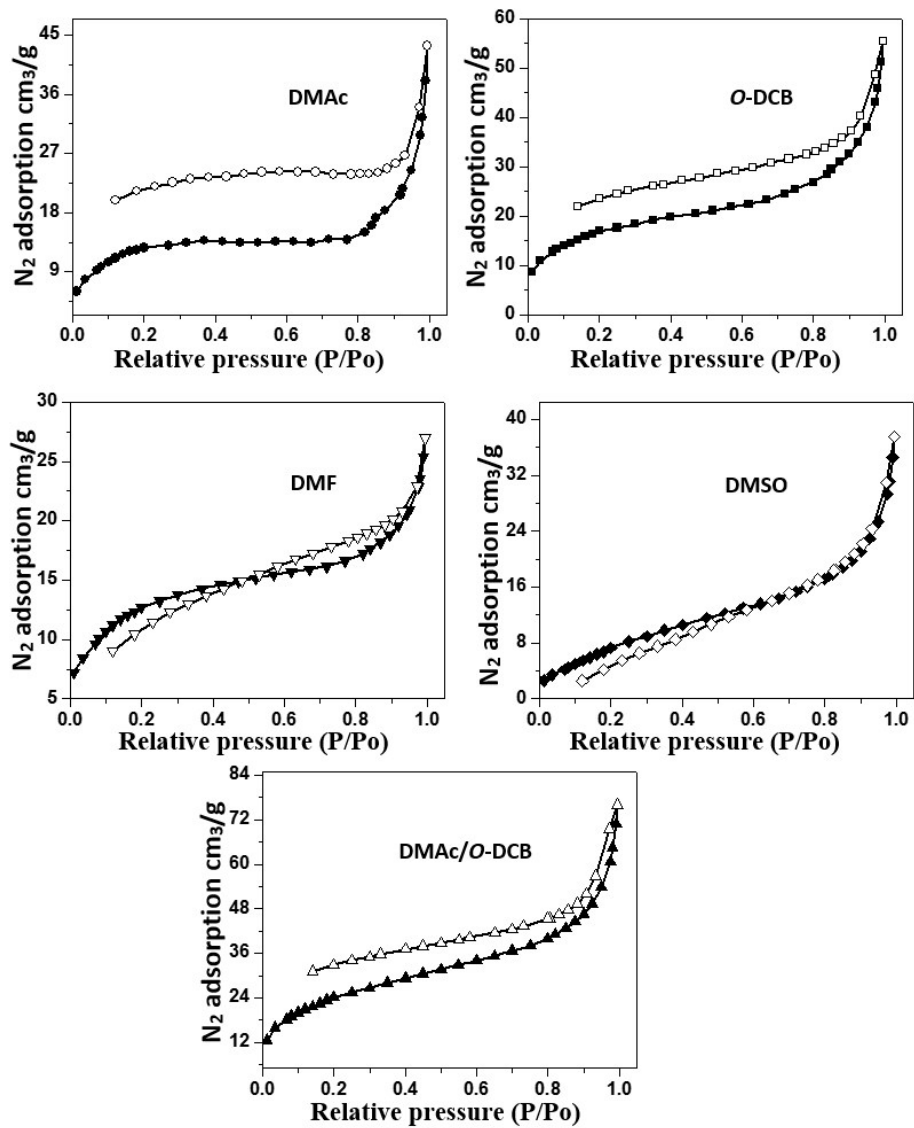

241  
 242  
 243  
 244  
 245  
 246  
 247  
 248  
 249  
 250  
 251

**Fig. S11.** N<sub>2</sub> adsorption isotherm of TFBFH fabricated with different solvents.

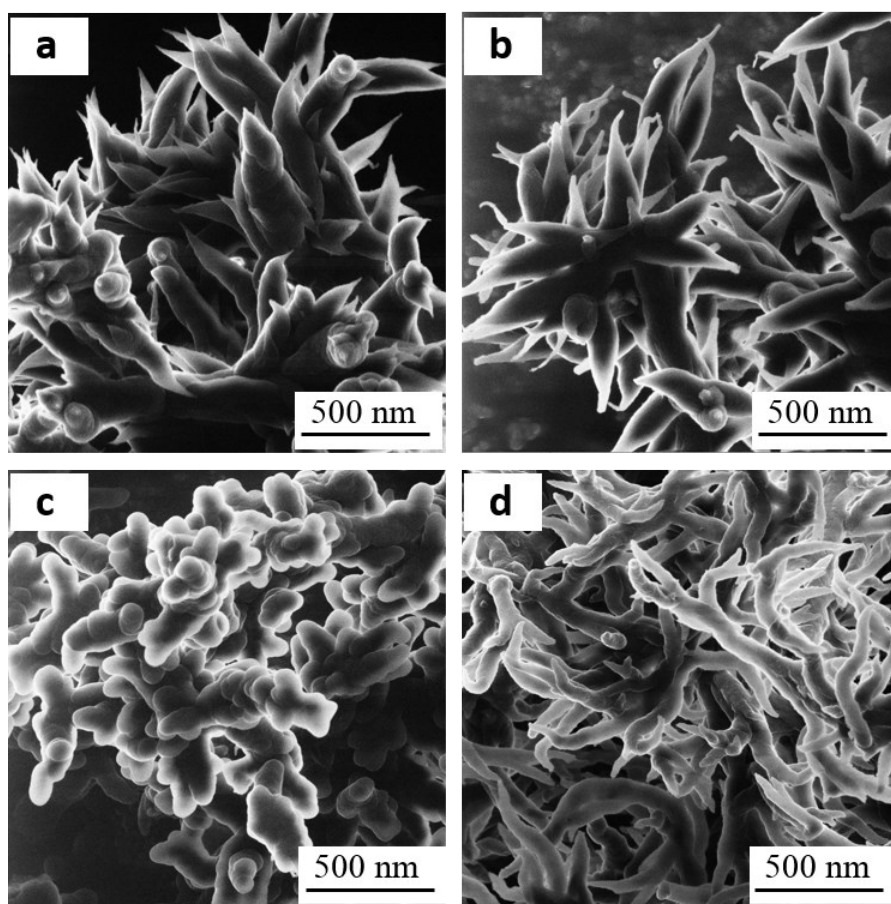

252  
253  
254  
255  
256  
257  
258  
259  
260  
261

**Fig. S12.** HIM micrographs of (a, b) TpFH and (c, d) TFBFH fabricated with (a, c) DMF and (b, d) DMSO.

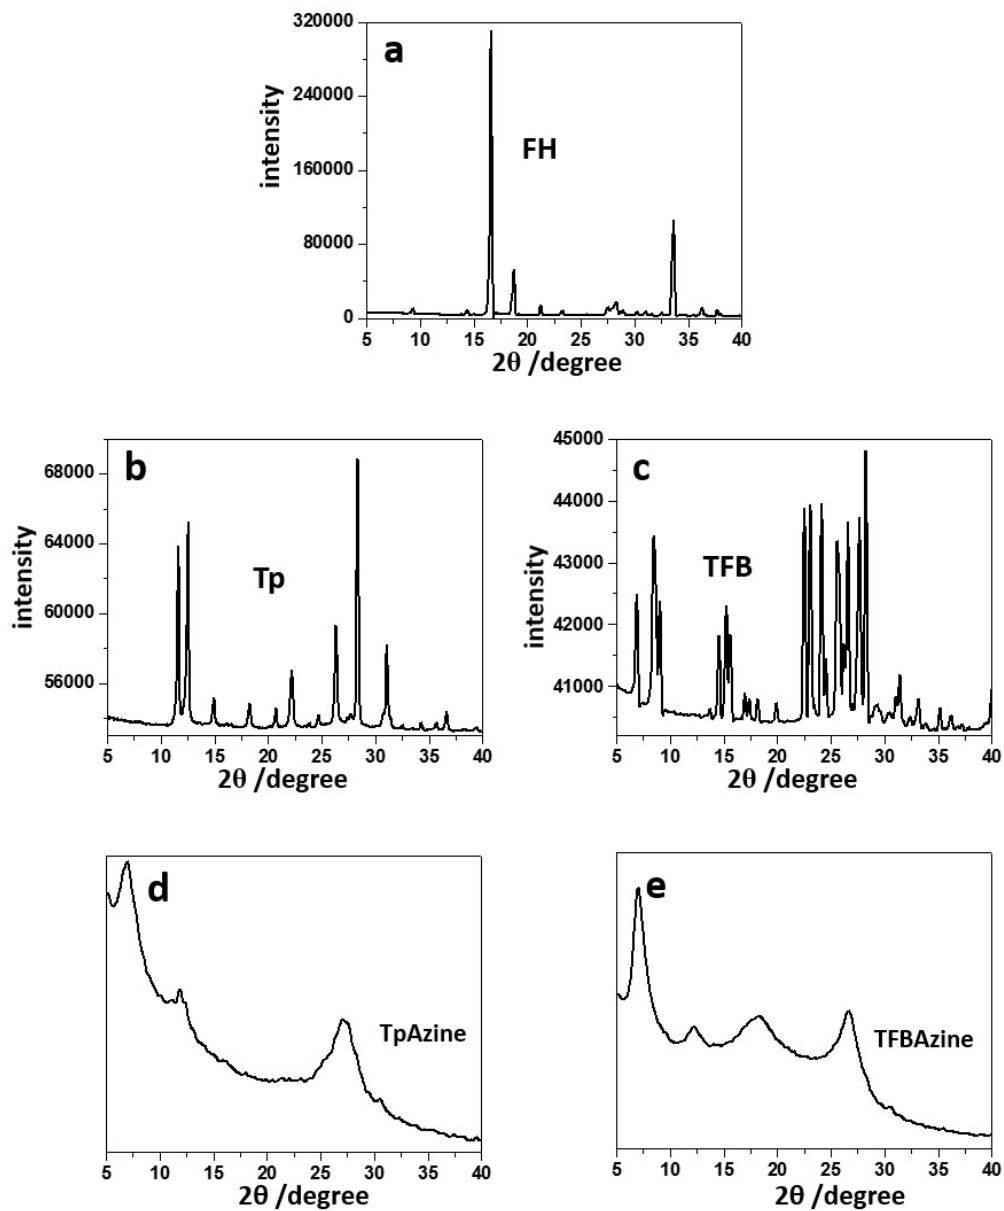

262

263 **Fig. S13.** PXRD patterns of (a) FH, (b) Tp, (c) TFB, (d) TpAzine and (e) TFBAzine.

264

265

266

267

268

269

270



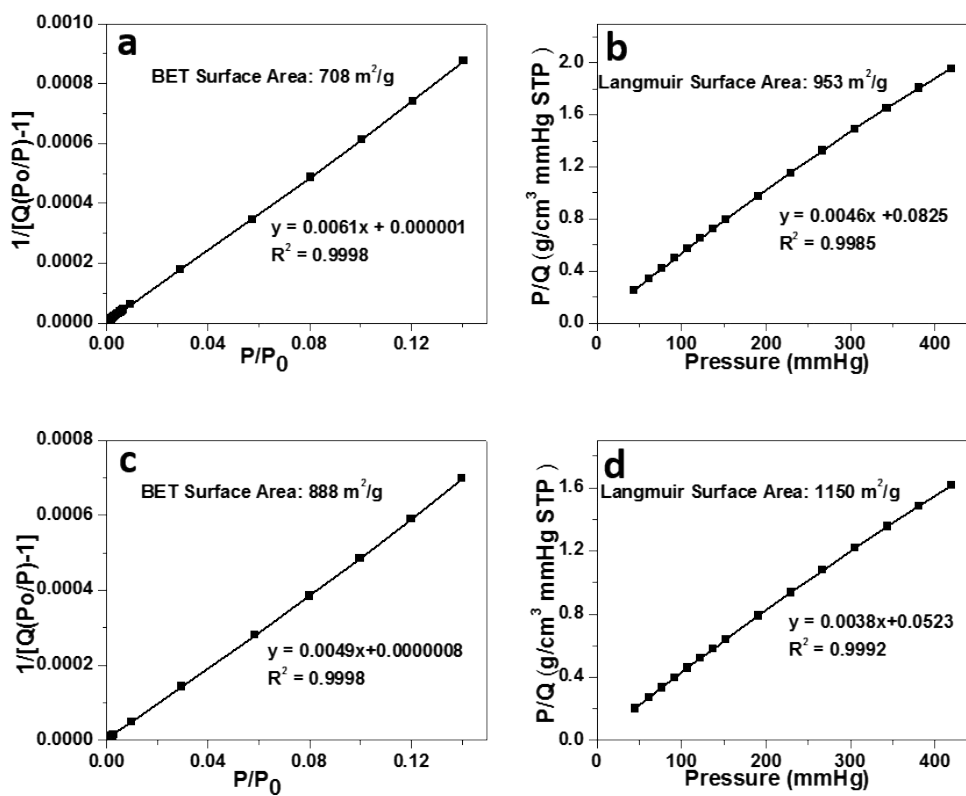

271

272

**Fig. S14.** (a, c) BET, (b, d) Langmuir surface area plots of (a, b) TpFH and (c, d) TFBFH.

273

274

275

276

277

278

279

280

281

282

283

284

285

286

287

288

289

290

291

292

293

294

295

296

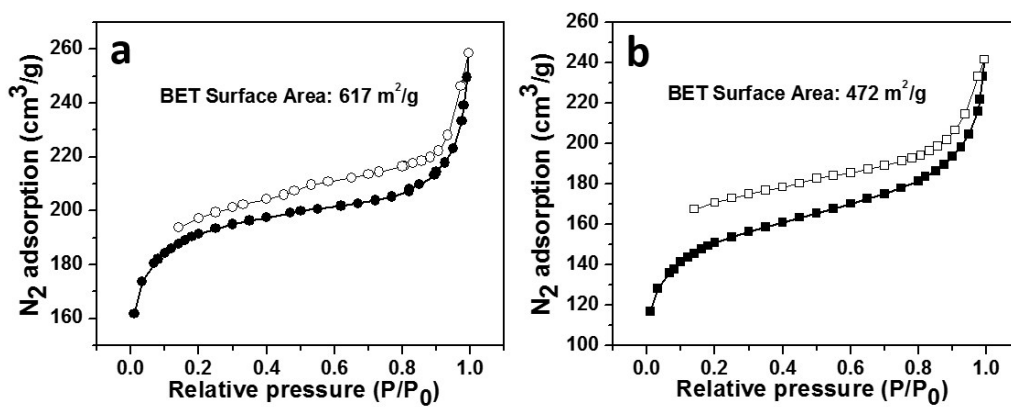

297

298

299

300

301

302

303

304

305

306

307

308

309

310

311

312

313

314

315

316

Fig. S15. N<sub>2</sub> adsorption isotherm (77 K) of (a) TpAzine and (b) TFBAzine.

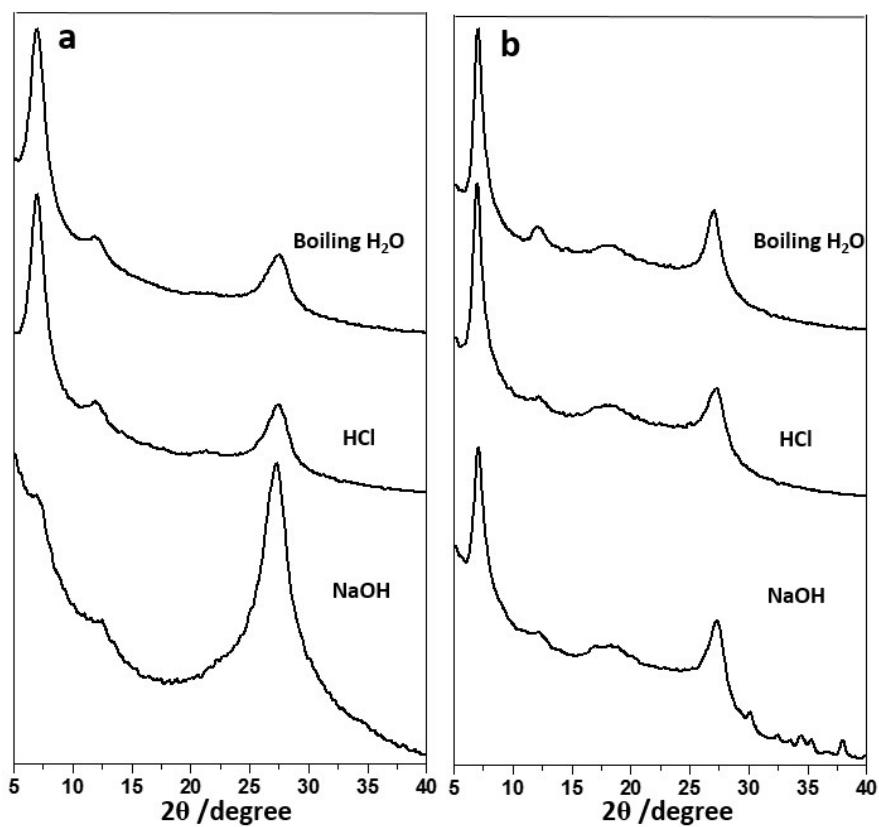

317  
318  
319  
320  
321  
322  
323  
324  
325  
326  
327  
328  
329  
330  
331  
332  
333  
334

**Fig. S16.** PXR D patterns after treatment in different systems of (a) TpFH and (b) TFBFH.

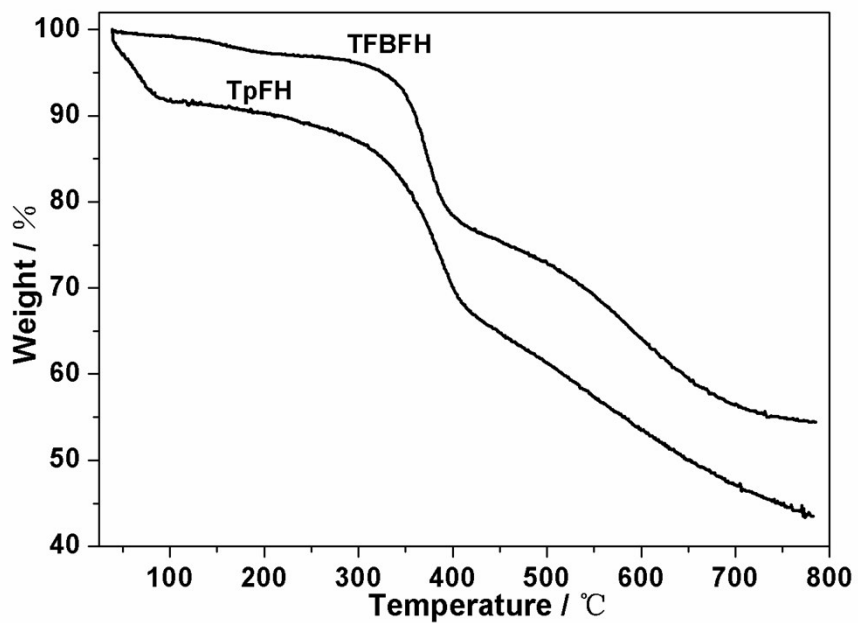

335

336

**Fig. S17.** TGA analysis result of as-synthesized COFs under N<sub>2</sub> atmosphere.

337

338

339

340

341

342

343

344

345

346

347

348

349

350

351

352

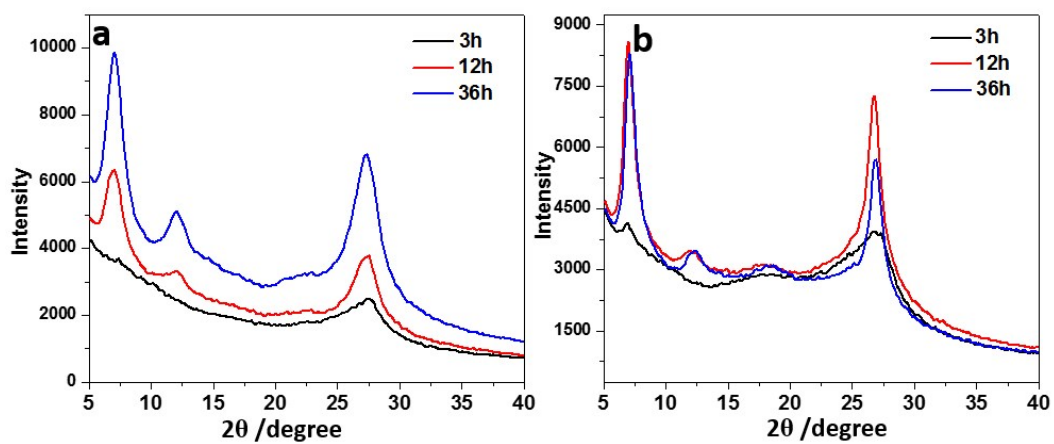

353

354 **Fig. S18.** PXRD patterns of COFs (a) TpFH and (b) TFBFH with different time  
355 intervals.

356

357

358

359

360

361

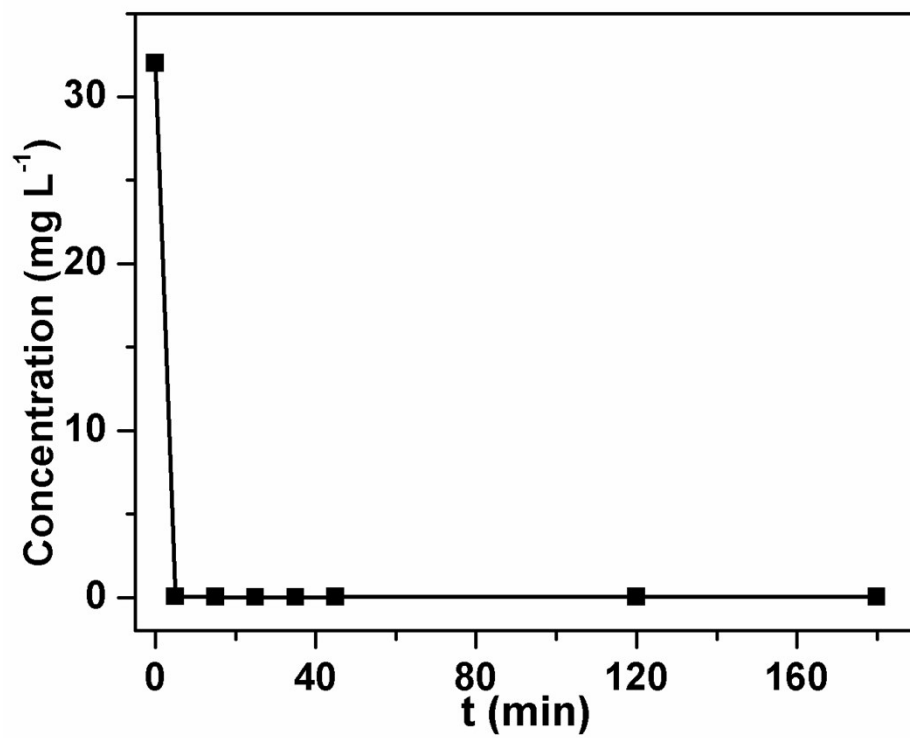

362

363 **Fig. S19.** Cu(II) sorption kinetics under the initial Cu(II) concentration of 32 mg L<sup>-1</sup>.

364

365

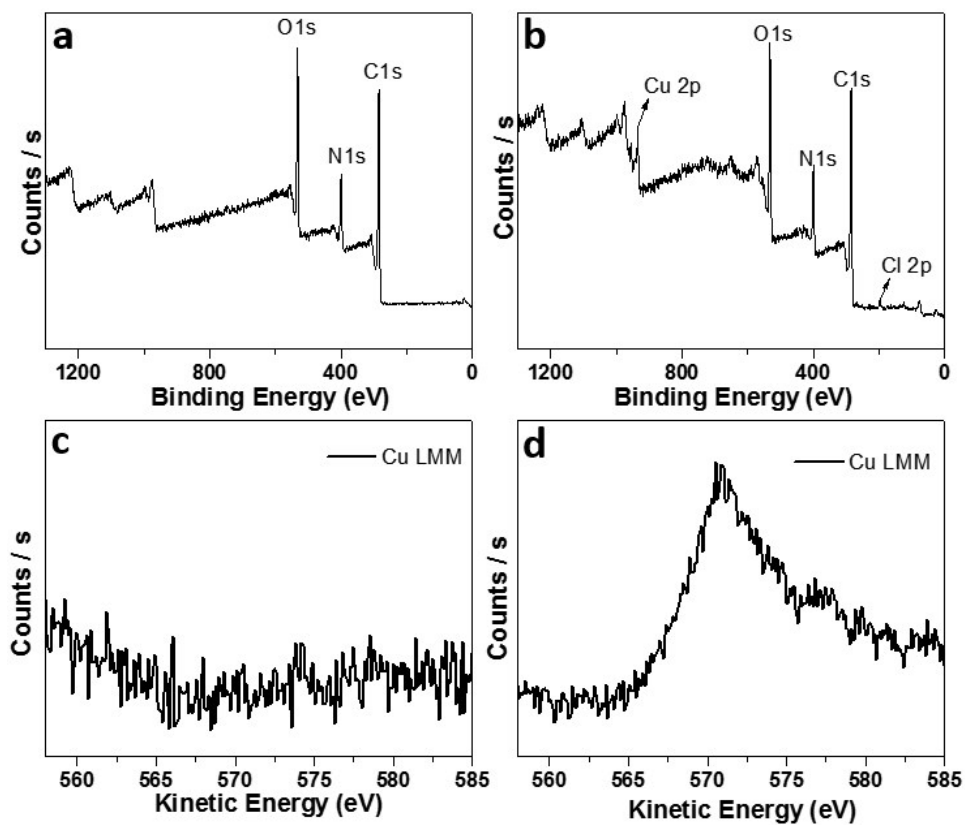

366  
 367  
 368  
 369  
 370  
 371  
 372

**Fig. S20.** (a, b) Low-resolution XPS survey wide scans spectra and (c, d) Cu LMM spectra of Cu(II) of (a, c) TpFH and (b, d) TpFH-Cu.

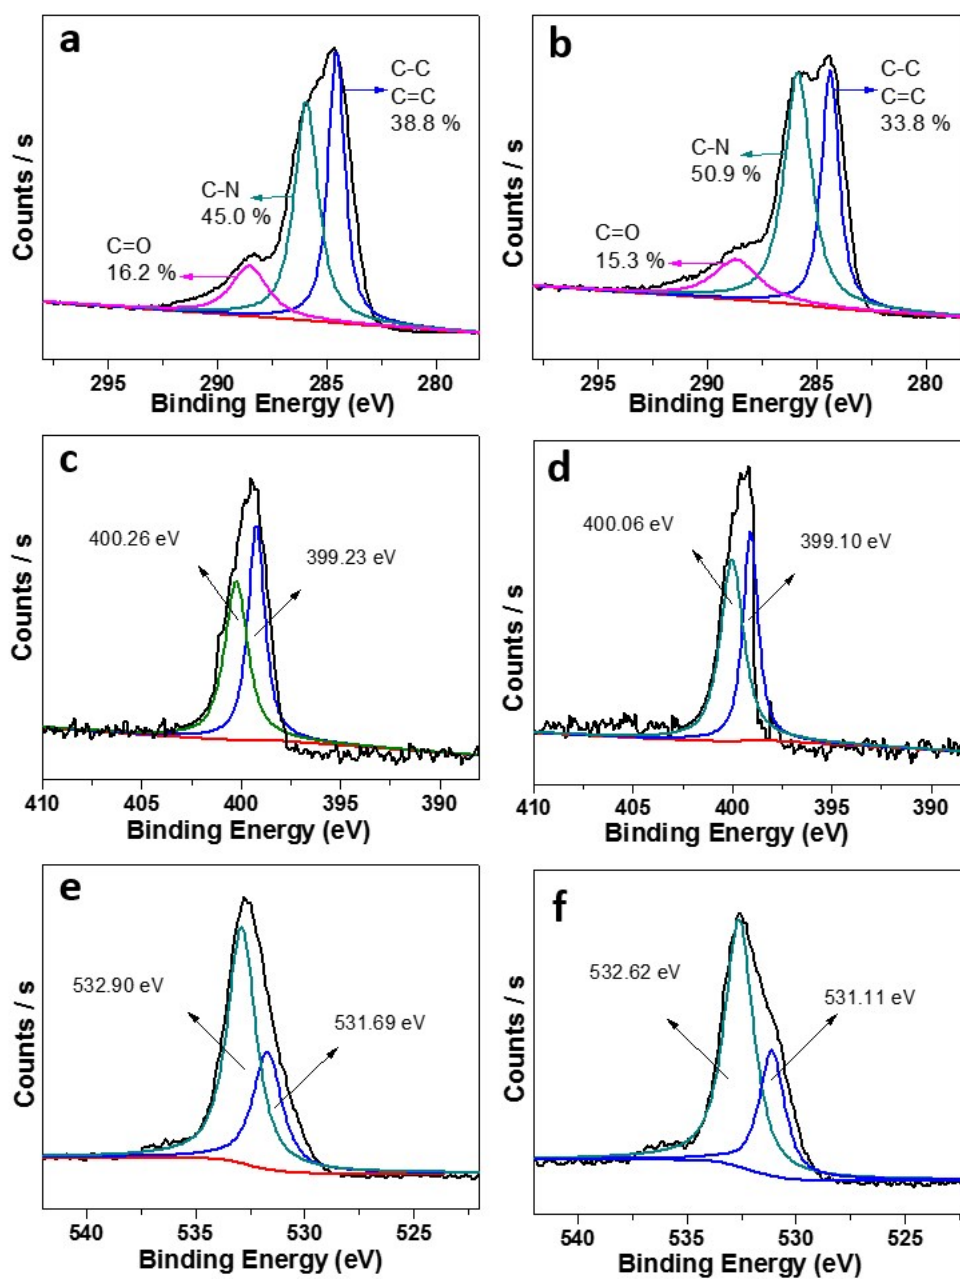

Fig. S21. High-resolution XPS (a, b) C1s, (c, d) N1s, (e, f) O1s, spectra of (a, c, e) TpFH and (b, d, f) TpFH-Cu.

373  
 374  
 375  
 376  
 377  
 378  
 379  
 380  
 381  
 382  
 383  
 384  
 385  
 386



**Table S1** Fractional atomic coordinates for the unit cell of TpFH.

| <b>TpFH in eclipsed (AA) model, (Space group-<i>P1</i>)</b>                                     |            |            |            |
|-------------------------------------------------------------------------------------------------|------------|------------|------------|
| <b>a=15.39 Å, b=3.28Å, c=14.48 Å;</b>                                                           |            |            |            |
| <b><math>\alpha=90^\circ</math>, <math>\beta=120^\circ</math>, <math>\gamma=90^\circ</math></b> |            |            |            |
| <b>Atom</b>                                                                                     | <b>x/a</b> | <b>y/b</b> | <b>z/c</b> |
| N1                                                                                              | 0.48134    | 0.51644    | 0.45564    |
| C2                                                                                              | 0.19877    | 0.51644    | 0.62360    |
| C3                                                                                              | 0.38328    | 0.51644    | 0.75967    |
| C4                                                                                              | 0.33184    | 0.51644    | 0.57101    |
| C5                                                                                              | 0.46218    | 0.51644    | 0.86826    |
| H6                                                                                              | 0.54377    | 0.51644    | 0.88800    |
| C7                                                                                              | 0.09257    | 0.51644    | 0.59569    |
| H8                                                                                              | 0.07227    | 0.51644    | 0.66138    |
| N9                                                                                              | 0.02392    | 0.51644    | 0.50035    |
| C10                                                                                             | 0.57458    | 0.51644    | 0.48078    |
| H11                                                                                             | 0.63598    | 0.51644    | 0.56822    |
| N12                                                                                             | 0.49612    | 0.51644    | 0.03264    |
| C13                                                                                             | 0.65645    | 0.51644    | 0.23880    |
| O14                                                                                             | 0.67606    | 0.51644    | 0.18086    |
| C15                                                                                             | 0.70818    | 0.51644    | 0.42853    |
| C16                                                                                             | 0.52263    | 0.51644    | 0.29170    |
| O17                                                                                             | 0.44635    | 0.51644    | 0.27165    |
| O18                                                                                             | 0.16887    | 0.51644    | 0.46457    |
| N19                                                                                             | 0.45238    | 0.51644    | 0.51547    |
| C20                                                                                             | 0.73495    | 0.51644    | 0.34750    |
| C21                                                                                             | 0.55044    | 0.51644    | 0.21144    |
| C22                                                                                             | 0.60188    | 0.51644    | 0.40010    |
| C23                                                                                             | 0.47154    | 0.51644    | 0.10284    |
| H24                                                                                             | 0.38995    | 0.51644    | 0.08310    |
| C25                                                                                             | 0.84115    | 0.51644    | 0.37541    |
| H26                                                                                             | 0.86145    | 0.51644    | 0.30972    |
| N27                                                                                             | 0.90980    | 0.51644    | 0.47075    |
| C28                                                                                             | 0.35914    | 0.51644    | 0.49033    |
| H29                                                                                             | 0.29774    | 0.51644    | 0.40288    |
| N30                                                                                             | 0.43760    | 0.51644    | 0.93846    |
| C31                                                                                             | 0.27727    | 0.51644    | 0.73230    |
| O32                                                                                             | 0.25766    | 0.51644    | 0.79025    |
| C33                                                                                             | 0.22554    | 0.51644    | 0.54257    |
| C34                                                                                             | 0.41109    | 0.51644    | 0.67941    |
| O35                                                                                             | 0.48737    | 0.51644    | 0.69945    |
| O36                                                                                             | 0.76485    | 0.51644    | 0.50653    |
| H37                                                                                             | 0.49003    | 0.75804    | 0.56813    |
| H38                                                                                             | 0.38575    | 0.74689    | 0.92565    |

|     |         |         |         |
|-----|---------|---------|---------|
| H39 | 1.01663 | 0.72331 | 1.45691 |
| H40 | 0.44369 | 0.75804 | 0.40297 |
| H41 | 0.54797 | 0.74689 | 0.04545 |
| H42 | 0.90059 | 0.30957 | 0.51984 |

388

**Table S2** Fractional atomic coordinates for the unit cell of TFBFH.

| <b>TFBFH in eclipsed (AA) model, (Space group-<i>P1</i>)</b>                                    |            |            |            |
|-------------------------------------------------------------------------------------------------|------------|------------|------------|
| <b>a=15.27 Å, b=3.35Å, c=14.18 Å;</b>                                                           |            |            |            |
| <b><math>\alpha=90^\circ</math>, <math>\beta=120^\circ</math>, <math>\gamma=90^\circ</math></b> |            |            |            |
| <b>Atom</b>                                                                                     | <b>x/a</b> | <b>y/b</b> | <b>z/c</b> |
| N1                                                                                              | 0.50332    | 0.47986    | 0.48335    |
| C2                                                                                              | 0.21751    | 0.47986    | 0.65799    |
| C3                                                                                              | 0.40413    | 0.47986    | 0.79946    |
| C4                                                                                              | 0.35211    | 0.47986    | 0.60331    |
| C5                                                                                              | 0.48395    | 0.47986    | 0.91237    |
| H6                                                                                              | 0.56649    | 0.47986    | 0.93361    |
| C7                                                                                              | 0.11008    | 0.47986    | 0.62897    |
| H8                                                                                              | 0.08929    | 0.47986    | 0.69578    |
| N9                                                                                              | 0.04064    | 0.47986    | 0.52984    |
| C10                                                                                             | 0.59763    | 0.47986    | 0.50949    |
| N11                                                                                             | 0.51827    | 0.47986    | 0.04355    |
| C12                                                                                             | 0.68045    | 0.47986    | 0.25790    |
| H13                                                                                             | 0.70060    | 0.47986    | 0.19060    |
| C14                                                                                             | 0.73277    | 0.47986    | 0.45517    |
| C15                                                                                             | 0.54509    | 0.47986    | 0.31290    |
| H16                                                                                             | 0.46267    | 0.47986    | 0.29211    |
| H17                                                                                             | 0.18281    | 0.47986    | 0.48442    |
| N18                                                                                             | 0.47403    | 0.47986    | 0.54556    |
| C19                                                                                             | 0.75985    | 0.47986    | 0.37092    |
| C20                                                                                             | 0.57322    | 0.47986    | 0.22945    |
| C21                                                                                             | 0.62525    | 0.47986    | 0.42560    |
| C22                                                                                             | 0.49341    | 0.47986    | 0.11654    |
| C23                                                                                             | 0.86727    | 0.47986    | 0.39994    |
| N24                                                                                             | 0.93671    | 0.47986    | 0.49907    |
| C25                                                                                             | 0.37972    | 0.47986    | 0.51942    |
| H26                                                                                             | 0.31808    | 0.47986    | 0.43005    |
| N27                                                                                             | 0.45908    | 0.47986    | 0.98536    |
| C28                                                                                             | 0.29690    | 0.47986    | 0.77101    |
| H29                                                                                             | 0.27676    | 0.47986    | 0.83831    |
| C30                                                                                             | 0.24458    | 0.47986    | 0.57374    |
| C31                                                                                             | 0.43226    | 0.47986    | 0.71601    |
| H32                                                                                             | 0.51468    | 0.47986    | 0.73680    |
| H33                                                                                             | 0.79455    | 0.47986    | 0.54449    |
| H34                                                                                             | 0.88659    | 0.47986    | 0.33609    |
| H35                                                                                             | 0.65655    | 0.47985    | 0.59446    |
| H36                                                                                             | 0.41456    | 0.47986    | 0.09653    |

393 **Table S3** Elemental composition of the TpFH and TpFH-Cu sample based upon  
394 analysis of the survey spectra.

| Peak   | Peak BE/eV | At. % (TpFH) | At. % (TpFH-Cu) |
|--------|------------|--------------|-----------------|
| O 1S   | 532.51     | 21.38        | 20.56           |
| C 1S   | 285.18     | 64.53        | 60.4            |
| N 1S   | 399.81     | 14.09        | 15.71           |
| Cu 2p3 | 934.26     | 0            | 2.14            |
| Cl 2P3 | 198.05     | 0            | 1.18            |

395
